# Supplementary material
Source: publisher figshare collection journal article supplement (https://tandf.figshare.com/ndownloader/files/16617992)
Supplement: Supplementary file 1 [file 16617992]

**Supplementary Material**

**Predicting functional long non-coding RNAs validated**

**by low throughput experiments**

Bailing Zhoua,b, Yuedong Yanga,c,d, Jian Zhand, Xianghua Doua,b, Jihua Wanga,b*, and Yaoqi Zhoua,d*

*aShandong Provincial Key Laboratory of Biophysics, Institute of Biophysics, Dezhou University, Dezhou, China; bCollege of Physics and Electronic Information, Dezhou University, Dezhou, China; cSchool of Data and Computer Science, Sun Yat-sen University, Guangzhou, China; dInstitute for Glycomics and School of Information and Communication Technology, Griffith University, Gold Coast, QLD, Australia*

*corresponding author: Yaoqi Zhou, e-mail: [yaoqi.zhou@griffith.edu.au](mailto:yaoqi.zhou@griffith.edu.au), address: Institute for Glycomics and School of Information and Communication Technology, Griffith University, Gold Coast, QLD 4222, Australia; Jihua Wang, e-mail: [jhw25336@126.com](mailto:jhw25336@126.com), address: Shandong Provincial Key Laboratory of Biophysics, Institute of Biophysics, Dezhou University, Dezhou 253023, China

**SUPPLEMENTAL TABLE**

Table S1. Newly validated human lncRNAs.

| Name | Function | Method | Ref. |
| --- | --- | --- | --- |
| ZNF582-AS1 | Suppress colony formation by CRC cells | qRT-PCR, ectopic expression | [1] |
| SOCS2-AS1 | Modulating the epigenetic control | qRT-PCR, knockdown, Western Blot, ChIP Assay, RIP Assay | [2] |
| SNHG20 | Promote cell proliferation, etc. | qRT-PCR, western blot, knockdown | [3] |
| SNHG18 | Inhibit semaphorin 5A expression | qRT-PCR, knockdown, in situ hybridization, immunohistochemistry, Western blot | [4] |
| LNCPRESS1 | Interacts with SIRT6 | qRT-PCR, ChIP-qPCR | [5] |
| MHENCR | Bound to miR-425 and miR-489 | qRT-PCR, knockdown, Western blot, RNA Immunoprecipitation | [6] |
| SATB2-AS1 | Expression regulation | qRT-PCR, knockdown | [7] |
| PTOV1-AS1 | Expression regulation | knockdown, western blotting and Ago2 immunoprecipitation | [8] |
| LINC00441 | Epigenetic interaction with RB1 | gain- and loss-of-function investigation, RNA pull-down assay, Luciferase reporter gene assay, Chromatin immunoprecipitation | [9] |
| LINC01013 | Induce snail | knockdown, overexpression | [10] |
| HCG11 | Interaction with IGF2BP1 | knockdown, Western blot | [11] |
| TPM1-AS | Regulates the alternative splicing of TPM1 | In situ hybridization and RNA immunoprecipitation assays, knockdown, overexpression, qRT-PCR, western blot | [12] |
| LINC00319 | Binding with miR-32 | knockdown, Luciferase acitivity and RNA pull-down assays | [13] |
| SOX21-AS1 | Expression inhibition | qRT-PCR, western-blot and immunohistochemistry | [14] |
| ZNF503-AS1 | Downregulation of ZNF503 expression. | qRT-PCR, Fluorescent in situ hybridization, Immunoblotting, | [15] |
| LINC00968 | Oncogene in non-small cell lung cancer | qRT-PCR, Western Blot, knockdown, overexpression | [16] |
| SNHG17 | Binding to enhancer of zeste homolog 2 | qRT-PCR, knockdown, RNA immunoprecipitation (RIP) assay, Chromatin immunoprecipitation (ChIP) assay, Western blot | [17] |
| FIRRE | Interacts with heterogeneous nuclear ribonucleoproteins U | qRT-PCR, knockdown, Western blot, Northern blot, RNA immunoprecipitation, luciferase assay | [18] |
| GHRLOS | Cancer biomarker | qRT-PCR | [19] |
| MIR22HG | Cancer prognosis | qRT-PCR, knockdown | [20] |
| IDH1-AS1 | Repressed by c-Myc | knockdown, overexpression | [21] |
| FOXD3-AS1 | Interaction with miR-150 | Northern blot, knockdown, overexpression, qRT-PCR, Western blot, Luciferase reporter assay | [22] |
| LINP1 | Facilitates DNA damage repair through non-homologous end joining (NHEJ) pathway | qRT–PCR, knockdown, RNA immunoprecipitation, western blot, Fluorescence in situ hybridization | [23] |
| MIR222HG | Association with the RNA-induced silencing complex | qRT-PCR, Dual-luciferase reporter assay, knockdown, overexpression | [24] |

References

[1] Kumegawa K, Maruyama R, Yamamoto E, et al. A genomic screen for long noncoding RNA genes epigenetically silenced by aberrant DNA methylation in colorectal cancer. Sci Rep. 2016;6:26699.

[2] Misawa A, Takayama K, Urano T, et al. Androgen-induced long noncoding RNA (lncRNA) SOCS2-AS1 promotes cell growth and inhibits apoptosis in prostate cancer cells. J Biol Chem. 2016;291:17861-17880.

[3] Li C, Zhou L, He J, et al. Increased long noncoding RNA SNHG20 predicts poor prognosis in colorectal cancer. BMC Cancer. 2016;16:655.

[4] Zheng R, Yao Q, Ren C, et al. Upregulation of long noncoding RNA small nucleolar RNA host gene 18 promotes radioresistance of glioma by repressing semaphorin 5A. Int J Radiat Oncol Biol Phys. 2016;96:877-887.

[5] Jain AK, Xi Y, McCarthy R, et al. LncPRESS1 is a p53-regulated lncRNA that safeguards pluripotency by disrupting SIRT6 mediated de-acetylation of histone H3K56. Mol Cell. 2016;64:967-981.

[6] Chen X, Dong H, Liu S, et al. Long noncoding RNA MHENCR promotes melanoma progression via regulating miR-425/489-mediated PI3K-Akt pathway. Am J Transl Res. 2017;9:90-102.

[7] Liu SH, Zhu JW, Xu HH, et al. A novel antisense long non-coding RNA SATB2-AS1 overexpresses in osteosarcoma and increases cell proliferation and growth. Mol Cell Biochem. 2017;430:47-56.

[8] Shin CH, Ryu S, Kim HH. hnRNPK-regulated PTOV1-AS1 modulates heme oxygenase-1 expression via miR-1207-5p. BMB Rep. 2017;50:220-225.

[9] Tang J, Xie Y, Xu X, et al. Bidirectional transcription of Linc00441 and RB1 via H3K27 modification-dependent way promotes hepatocellular carcinoma. Cell Death Dis. 2017;8:e2675.

[10] Chung IH, Lu PH, Lin YH, et al. The long non-coding RNA LINC01013 enhances invasion of human anaplastic large-cell lymphoma. Sci Rep. 2017;7:295.

[11] Xu Y, Zheng Y, Liu H, et al. Modulation of IGF2BP1 by long non-coding RNA HCG11 suppresses apoptosis of hepatocellular carcinoma cells via MAPK signaling transduction. Int J Oncol. 2017;51:791-800.

[12] Huang GW, Zhang YL, Liao LD, et al. Natural antisense transcript TPM1-AS regulates the alternative splicing of tropomyosin I through an interaction with RNA-binding motif protein 4. Int J Biochem Cell Biol. 2017;90:59-67.

[13] Zhou B, Yuan W, Li X. Long intergenic noncoding RNA 319 (linc00319) promotes cell proliferation and invasion in lung cancer cells by directly downregulating the tumor suppressor MiR-32. Oncol Res. 2017.

[14] Lu X, Huang C, He X, et al. A novel long non-coding RNA, SOX21-AS1, indicates a poor prognosis and promotes lung adenocarcinoma proliferation. Cell Physiol Biochem. 2017;42:1857-1869.

[15] Chen X, Jiang C, Qin B, et al. LncRNA ZNF503-AS1 promotes RPE differentiation by downregulating ZNF503 expression. Cell Death Dis. 2017;8:e3046.

[16] Wang Y, Zhou J, Xu YJ, et al. Long non-coding RNA LINC00968 acts as oncogene in NSCLC by activating the Wnt signaling pathway. J Cell Physiol. 2018;233:3397-3406.

[17] Ma Z, Gu S, Song M, et al. Long non-coding RNA SNHG17 is an unfavourable prognostic factor and promotes cell proliferation by epigenetically silencing P57 in colorectal cancer. Mol Biosyst. 2017;13:2350-2361.

[18] Lu Y, Liu X, Xie M, et al. The NF-κB-responsive long noncoding RNA FIRRE regulates posttranscriptional regulation of inflammatory gene expression through interacting with hnRNPU. J Immunol. 2017;199:3571-3582.

[19] Wu S, Liu J, Wang X, et al. Aberrant expression of the long non-coding RNA GHRLOS and its prognostic significance in patients with colorectal cancer. J Cancer. 2017;8:4040-4047.

[20] Dong Y, Yan W, Zhang SL, et al. Prognostic values of long non-coding RNA MIR22HG for patients with hepatocellular carcinoma after hepatectomy. Oncotarget. 2017;8:114041-114049.

[21] Xiang S, Gu H, Jin L, et al. LncRNA IDH1-AS1 links the functions of c-Myc and HIF1alpha via IDH1 to regulate the Warburg effect. Proc Natl Acad Sci U S A. 2018;115:E1465-E1474.

[22] Zhao X, Li D, Huang D, et al. Risk-associated long noncoding RNA FOXD3-AS1 inhibits neuroblastoma progression by repressing PARP1-mediated activation of CTCF. Mol Ther. 2018;26:755-773.

[23] Wang X, Liu H, Shi L, et al. LINP1 facilitates DNA damage repair through non-homologous end joining (NHEJ) pathway and subsequently decreases the sensitivity of cervical cancer cells to ionizing radiation. Cell cycle. 2018;17:439-447.

[24] Sun T, Du SY, Armenia J, et al. Expression of lncRNA MIR222HG co-transcribed from the miR-221/222 gene promoter facilitates the development of castration-resistant prostate cancer. Oncogenesis. 2018;7:30.
